# Supplementary material for: A theoretical study of weak interactions in phenylenediamine homodimer clusters
Source: Royal Society of Chemistry journal article supplement (doi:10.1039/c6cp04922b), 2016-01-01
Supplement: c6cp04922b1.pdf [file c6cp04922b1.pdf]

Electronic Supplementary Material (ESI) for Physical Chemistry Chemical Physics.

This journal is © The Royal Society of Chemistry 2016

## A Theoretical Study on Weak Interactions in Phenylenediamine Homodimer Clusters

5

Chengqian Yuan,<sup>a,b</sup> Haiming Wu,<sup>a,b</sup> Meiye Jia,<sup>a</sup> Peifeng Su,<sup>\*c</sup> Zhixun Luo<sup>\*,a</sup> and Jiannian Yao<sup>\*,a</sup>

Received (in XXX, XXX) Xth XXXXXXXXXX 20XX, Accepted Xth XXXXXXXXXX 20XX

DOI: 10.1039/b000000x

<sup>a</sup> Beijing National Laboratory for Molecular Sciences (BNLMS), CAS Key Laboratory of Photochemistry, State Key Laboratory for Structural Chemistry of Unstable and Stable Species, Institute of Chemistry, Chinese Academy of Sciences, Beijing 100190, P. R. China.

Fax: +86-10-62553453; Tel: +86-10-62553453;

E-mail: zxlue@iccas.ac.cn, jnyao@iccas.ac.cn.

<sup>b</sup> University of Chinese Academy of Sciences (UCAS), Beijing 100049, P. R. China.

<sup>c</sup> Fujian Provincial Key Laboratory of Theoretical and Computational Chemistry, and College of Chemistry and Chemical Engineering, Xiamen University, Xiamen, Fujian 361005, China.

15

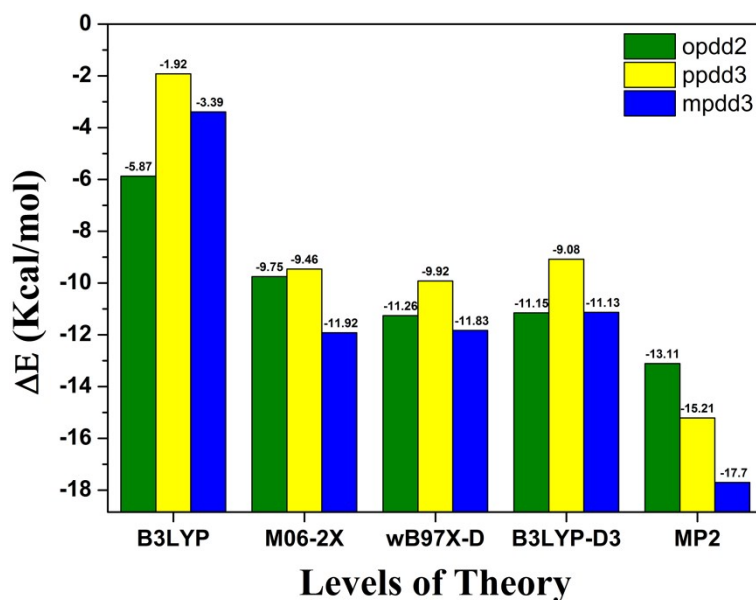

Fig S1. Interaction energies (kcal/mol) of the phenylenediamine homodimer clusters calculated at different levels of theory.

20 Interaction energies of phenylenediamine dimer (pdd) clusters calculated at traditional DFT B3LYP, dispersion-corrected DFT M06-2X, ωB97X-D, and B3LYP-D3 as well as the MP2 levels of theory are illustrated in Fig. S1 and also listed in Tables S1-S4. It is worth mentioning that the interaction energies of the pdd clusters obtained at the B3LYP level of theory largely differ from those calculated using dispersion-corrected DFT. This is because the B3LYP theory does not include the dispersion  
25 interaction, while the ωB97X-D functional includes empirical dispersion and treats hydrogen bonding and van der Waals forces more reasonable than conventional DFT.

**Table S1.** Interaction energies (kcal/mol) of all the phenylenediamine homodimer clusters calculated at the B3LYP/6-311++G(d,p) level of theory.

| Dimer cluster | $\Delta E$ | BSSE | ZPVE | $\Delta E^c$ | $\Delta E^{e0}$ |
|---------------|------------|------|------|--------------|-----------------|
| opdd1         | -6.41      | 0.79 | 1.30 | -5.61        | -4.31           |
| opdd2         | -6.49      | 0.62 | 1.54 | -5.87        | -4.33           |
| opdd3         | -5.05      | 0.54 | 1.07 | -4.51        | -3.44           |
| ppdd1         | -3.67      | 0.48 | 0.89 | -3.19        | -2.3            |
| ppdd2         | -3.65      | 0.63 | 0.90 | -3.02        | -2.12           |
| ppdd3         | -2.60      | 0.68 | 0.67 | -1.92        | -1.25           |
| mpdd1         | -4.84      | 0.71 | 1.00 | -4.13        | -3.13           |
| mpdd2         | -4.00      | 0.61 | 0.95 | -3.39        | -2.44           |
| mpdd3         | -3.44      | 0.60 | 0.68 | -2.84        | -2.16           |
| mpdd4         | -3.99      | 0.76 | 0.88 | -3.23        | -2.35           |
| mpdd5         | -3.76      | 0.48 | 0.79 | -3.28        | -2.49           |

$\Delta E^c$ : BSSE corrected interaction energy;  $\Delta E^{e0}$ : BSSE+ZPE corrected interaction energy.

**Table S2.** Interaction energies (kcal/mol) of all the phenylenediamine homodimer clusters calculated at the M06-2X/6-5 311++G(d,p) level of theory.

| Dimer cluster | $\Delta E$ | BSSE | ZPVE | $\Delta E^c$ | $\Delta E^{e0}$ |
|---------------|------------|------|------|--------------|-----------------|
| opdd1         | -9.82      | 1.79 | 1.01 | -8.03        | -7.02           |
| opdd2         | -10.47     | 0.72 | 1.45 | -9.75        | -8.3            |
| opdd3         | -8.29      | 0.80 | 0.98 | -7.49        | -6.51           |
| ppdd1         | -9.01      | 1.06 | 1.02 | -7.95        | -6.93           |
| ppdd2         | -8.69      | 1.14 | 1.01 | -7.55        | -6.54           |
| ppdd3         | -10.81     | 1.35 | 1.15 | -9.46        | -8.31           |
| mpdd1         | -10.92     | 0.9  | 1.09 | -10.02       | -8.93           |
| mpdd2         | -13.37     | 1.44 | 1.26 | -11.92       | -10.66          |
| mpdd3         | -10.31     | 1.27 | 0.89 | -9.03        | -8.14           |
| mpdd4         | -12.43     | 1.41 | 0.74 | -11.01       | -10.27          |
| mpdd5         | -6.34      | 0.69 | 0.49 | -5.65        | -5.16           |

$\Delta E^c$ : BSSE corrected interaction energy;  $\Delta E^{e0}$ : BSSE+ZPE corrected interaction energy.

**Table S3.** Interaction energies (kcal/mol) of all the phenylenediamine homodimer clusters calculated at the B3LYP-D3/6-311++G(d,p) level of theory.

| Dimer cluster | $\Delta E$ | BSSE | ZPVE | $\Delta E^c$ | $\Delta E^{e0}$ |
|---------------|------------|------|------|--------------|-----------------|
| opdd1         | -          |      |      |              |                 |
| opdd2         | -11.89     | 0.74 | 1.82 | -11.15       | -9.33           |
| opdd3         | -8.86      | 0.68 | 1.19 | -8.18        | -6.99           |
| ppdd1         |            |      |      |              |                 |
| ppdd2         | -8.34      | 0.88 | 1.17 | -7.46        | -6.29           |
| ppdd3         | -10.26     | 1.18 | 1.30 | -9.08        | -7.78           |
| mpdd1         | -10.67     | 1.21 | 1.46 | -9.46        | -8.00           |
| mpdd2         | -12.26     | 1.13 | 1.34 | -11.13       | -9.79           |
| mpdd3         | -9.89      | 1.13 | 1.10 | -8.76        | -7.66           |
| mpdd4         | -11.79     | 1.23 | 1.17 | -10.56       | -9.39           |
| mpdd5         |            |      |      |              |                 |

$\Delta E^c$ : BSSE corrected interaction energy;  $\Delta E^{e0}$ : BSSE+ZPE corrected interaction energy.

**Table S4.** Interaction energies (kcal/mol) of all the phenylenediamine homodimer clusters calculated at different basis sets on the  $\omega$ B97X-D and MP2 levels of theory.

| Theory                          | opdd2      |              | ppdd3      |              | mpdd2      |              |
|---------------------------------|------------|--------------|------------|--------------|------------|--------------|
|                                 | $\Delta E$ | $\Delta E^e$ | $\Delta E$ | $\Delta E^e$ | $\Delta E$ | $\Delta E^e$ |
| $\omega$ B97X-D/6-311++g(d,p)   | -12        | -11.26       | -11.01     | -9.92        | -12.97     | -11.83       |
| $\omega$ B97X-D/6-311++g(2d,p)  | -11.16     | -10.68       | -10.31     | -9.56        | -12.23     | -11.54       |
| $\omega$ B97X-D/6-311++g(3d,p)  | -10.97     | -10.54       | -10.30     | -9.50        | -12.12     | -11.34       |
| $\omega$ B97X-D/6-311++g(2d,2p) | -11.03     | -10.58       | -9.94      | -9.37        | -11.83     | -11.30       |
| $\omega$ B97X-D/aug-cc-pvdz     | -11.54     | -10.22       | -10.75     | -9.44        | -12.67     | -11.28       |
| $\omega$ B97X-D/aug-cc-pvtz     | -10.70     | -10.37       | -9.61      | -9.24        | -11.39     | -11.00       |
| MP2/6-311++g(d,p)               | -11.76     | -8.13        | -13.81     | -7.89        | -16.06     | -10.15       |
| MP2/aug-cc-pvtz                 | -13.11     | -8.67        | -15.21     | -9.26        | -17.70     | -11.59       |

$\Delta E^e$ : BSSE corrected interaction energy.

**Table S5.** NBO analysis of the intermolecular weak interactions in the secondary stable pdd clusters calculated at the

5  $\omega$ B97X-D/6-311++G(d,p) level of theory. The second-order perturbation energies  $E_{i \rightarrow j}^{(2)*}$  are in kcal/mol.

| Dimer cluster | Donor          | Acceptor       | $E_{i \rightarrow j}^{(2)*}$ | Sum of $E_{i \rightarrow j}^{(2)*}$ |
|---------------|----------------|----------------|------------------------------|-------------------------------------|
| <b>opdd1</b>  | LP (1) N2      | BD*(1) N17-H30 | 10.10                        | 20.20                               |
|               | LP (1) N18     | BD*(1) N1-H14  | 10.10                        |                                     |
| <b>ppdd1</b>  | LP (1) N1      | BD*(1) N17-H19 | 2.32                         | 4.03                                |
|               | LP (1) N1      | BD*(2) C23-C29 | 0.21                         |                                     |
|               | LP (1) N17     | BD*(2) C7-C8   | 0.13                         |                                     |
|               | BD (2) C7-C8   | BD*(2) C20-C21 | 0.21                         |                                     |
|               | BD (2) C20-C21 | BD*(2) C7-C8   | 0.79                         |                                     |
|               | BD (2) C23-C29 | BD*(2) N1-H2   | 0.15                         |                                     |
|               | BD (2) C23-C29 | BD*(2) C8-H9   | 0.22                         |                                     |
| <b>mpdd4</b>  | LP (1) N17     | BD*(1) N1-H3   | 1.57                         | 3.97                                |
|               | LP (1) N1      | BD*(2) C24-C26 | 0.17                         |                                     |
|               | LP (1) N4      | BD*(2) C27-C29 | 0.18                         |                                     |
|               | LP (1) N20     | BD*(2) C8-C10  | 0.16                         |                                     |
|               | BD(2) C23-C31  | BD*(1) C8-H9   | 0.15                         |                                     |
|               | BD(2) C24-C26  | BD*(2) C7-C15  | 0.32                         |                                     |
|               | BD(2) C24-C26  | BD*(1) C8-C10  | 0.62                         |                                     |
| BD(2) C27-C29 | BD*(1) N4-H6   | 0.44           |                              |                                     |
| BD(2) C27-C29 | BD*(2) C8-C10  | 0.36           |                              |                                     |

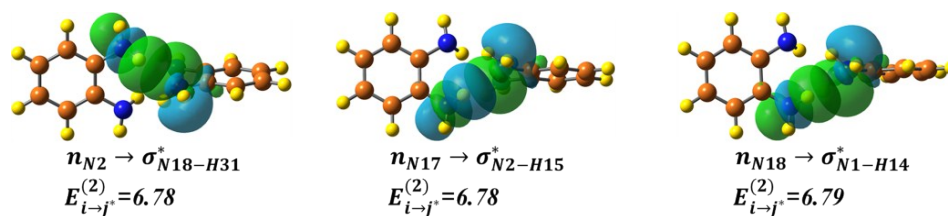

**Fig. S2** Natural bond orbitals patterns showing N-H $\cdots$ N hydrogen bonding in the opdd clusters. All the second-order perturbative energy is in kcal/mol.

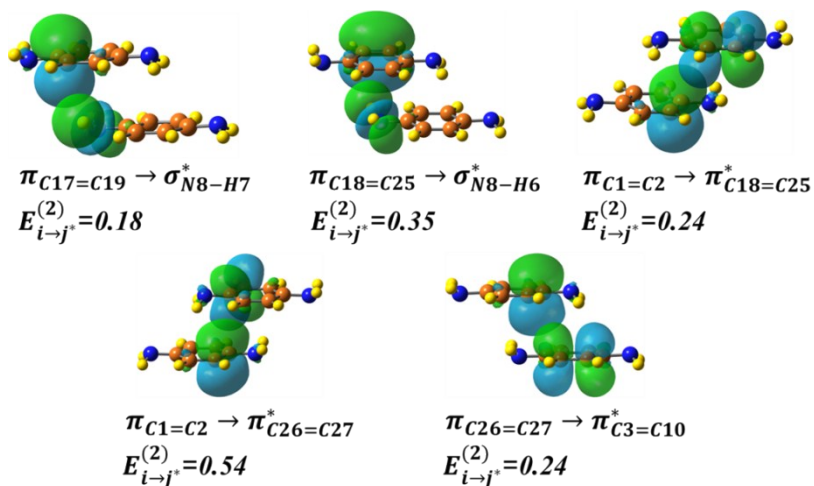

5

**Fig. S3** Natural bond orbitals patterns showing N-H $\cdots$  $\pi$  hydrogen bonding and  $\pi \cdots \pi^*$  interactions in the ppdd clusters. All the second-order perturbative energy is in kcal/mol.

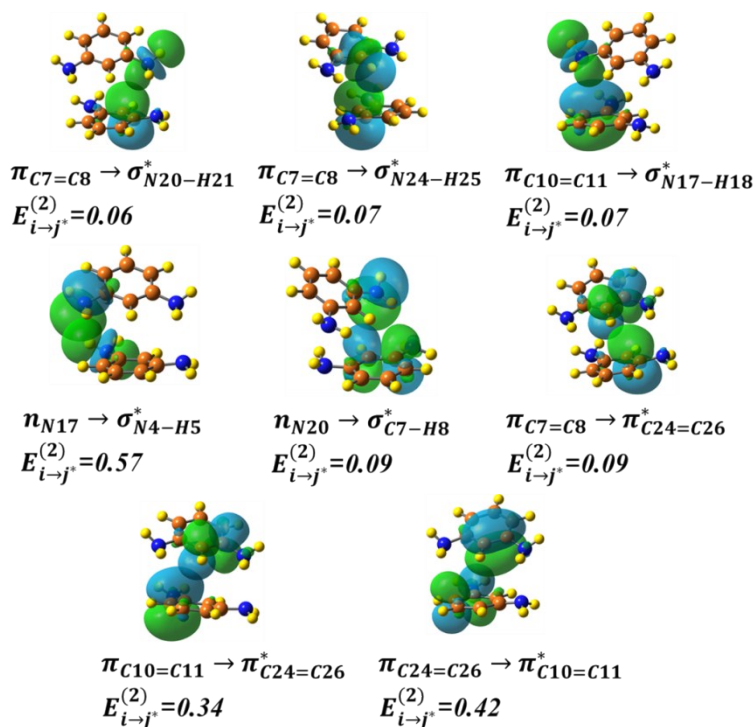

**Fig. S4** Natural bond orbitals patterns showing the N-H $\cdots$ N, N-H $\cdots$  $\pi$ , C-H $\cdots$ N, and  $\pi \cdots \pi$  interactions in the mpdd clusters.

10 All the second-order perturbative energy is in kcal/mol.

**Table S5.** Theoretical harmonic vibrational frequencies ( $\text{cm}^{-1}$ ), their assignments and relative intensities ( $\text{km/mol}$ ) of the N–H stretching modes of phenylenediamine monomers and their corresponding clusters calculated at the  $\omega\text{B97X-D/6-311++g(d,p)}$  level of theory.

| Geometry | Assignment        | $\nu_{\text{N-H}}$ | IR intensity | Raman intensity |
|----------|-------------------|--------------------|--------------|-----------------|
| opd      | $\nu_{\text{as}}$ | 3670               | 151          | 20              |
|          | $\nu_{\text{s}}$  | 3563               | 69           | 259             |
|          | $\nu_{\text{s}}$  | 3561               | 21           | 72              |
| opdd2    | $\nu_{\text{as}}$ | 3639               | 72           | 97              |
|          | $\nu_{\text{as}}$ | 3638               | 29           | 127             |
|          | $\nu_{\text{s}}$  | 3480               | 800          | 7               |
|          | $\nu_{\text{s}}$  | 3462               | 122          | 100             |
|          | $\nu_{\text{s}}$  | 3461               | 122          | 100             |
| ppd      | $\nu_{\text{as}}$ | 3693               | 939          | 105             |
|          | $\nu_{\text{s}}$  | 3596               | 228          | 366             |
| ppdd3    | $\nu_{\text{as}}$ | 3690               | 201          | 114             |
|          | $\nu_{\text{as}}$ | 3672               | 68           | 12              |
|          | $\nu_{\text{s}}$  | 3595               | 161          | 487             |
|          | $\nu_{\text{s}}$  | 3590               | 390          | 288             |
| mpd      | $\nu_{\text{as}}$ | 3711               | 173          | 66              |
|          | $\nu_{\text{as}}$ | 3610               | 221          | 319             |
|          | $\nu_{\text{as}}$ | 3711               | 361          | 66              |
|          | $\nu_{\text{as}}$ | 3699               | 184          | 52              |
| mpdd3    | $\nu_{\text{as}}$ | 3695               | 153          | 54              |
|          | $\nu_{\text{as}}$ | 3673               | 128          | 22              |
|          | $\nu_{\text{s}}$  | 3597               | 159          | 204             |
|          | $\nu_{\text{s}}$  | 3593               | 530          | 226             |
|          | $\nu_{\text{s}}$  | 3584               | 230          | 96              |

5

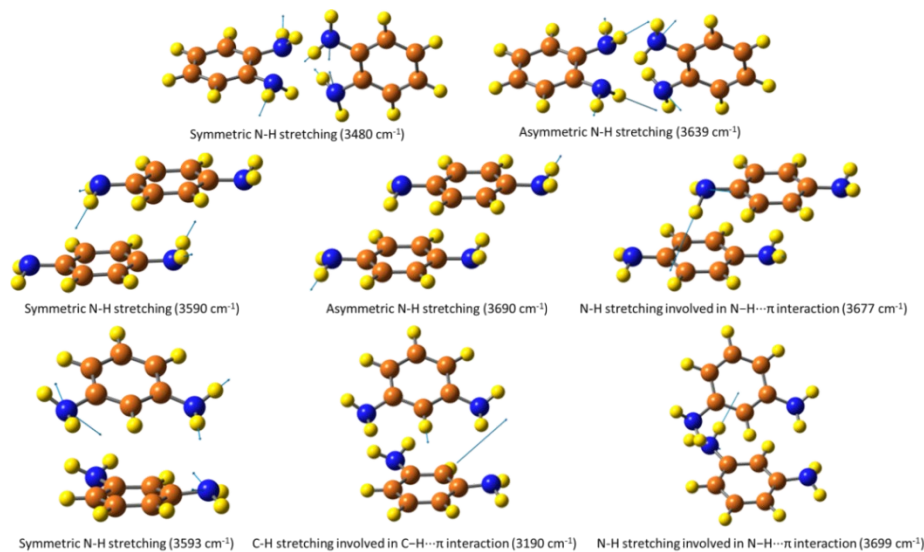

**Fig. S5** The normal modes of N–H stretches of the pdd clusters calculated at the  $\omega\text{B97X-D/6-311++G(d,p)}$  level of theory.
